# Supplementary material for: Identification and characterization of a novel Enterococcus bacteriophage with potential to ameliorate murine colitis
Source: PubMed Central journal article supplement (PMC8511138; doi:10.1038/s41598-021-99602-4), 2021-10-12
Supplement: 41598_2021_99602_MOESM1_ESM.pdf [file 41598_2021_99602_MOESM1_ESM.pdf]

Supplemental information

Identification and characterization of a novel *Enterococcus* bacteriophage  
with potential to ameliorate murine colitis

Junko Nishio, Hideo Negishi, Mika Yasui-Kato, Shoji Miki, Kazuhiko Miyanaga, Kotaro Aoki, Takuma Mizusawa, Masami Ueno, Akira Ainai, Masafumi Muratani, Sho Hangai, Hideyuki Yanai, Hideki Hasegawa, Yoshikazu Ishii, Yasunori Tanji, Tadatsugu Taniguchi

| CDS Position |       | Strand | Length (bp) | Function                                                   |
|--------------|-------|--------|-------------|------------------------------------------------------------|
| 360          | 34    | -      | 327         | prophage LambdaBa04, Gp54                                  |
| 577          | 350   | -      | 228         | hypothetical protein                                       |
| 1763         | 567   | -      | 1197        | Helix-turn-helix domain-containng protein                  |
| 2400         | 1987  | -      | 414         | RinA family phage transcriptional regulator                |
| 2613         | 2401  | -      | 213         | hypothetical protein                                       |
| 2775         | 2614  | -      | 162         | hypothetical protein                                       |
| 2868         | 2776  | -      | 93          | hypothetical protein                                       |
| 3074         | 2865  | -      | 210         | hypothetical protein                                       |
| 3275         | 3075  | -      | 201         | hypothetical protein                                       |
| 3576         | 3265  | -      | 312         | hypothetical protein                                       |
| 3959         | 3573  | -      | 387         | Hypothetical protein, Lmo2313 homolog [Bacteriophage A118] |
| 4004         | 4264  | +      | 261         | hypothetical protein                                       |
| 4477         | 4301  | -      | 177         | hypothetical protein                                       |
| 4821         | 4477  | -      | 345         | hypothetical protein                                       |
| 5140         | 4841  | -      | 300         | hypothetical protein                                       |
| 5324         | 5118  | -      | 207         | hypothetical protein                                       |
| 5587         | 5360  | -      | 228         | hypothetical protein                                       |
| 5935         | 5633  | -      | 303         | hypothetical protein                                       |
| 6190         | 5951  | -      | 240         | hypothetical protein                                       |
| 6542         | 6228  | -      | 315         | hypothetical protein                                       |
| 6772         | 6539  | -      | 234         | hypothetical protein                                       |
| 6912         | 6769  | -      | 144         | hypothetical protein                                       |
| 7244         | 6912  | -      | 333         | hypothetical protein                                       |
| 9884         | 7557  | -      | 2328        | DNA primase, phage associated                              |
| 10408        | 9905  | -      | 504         | Single stranded DNA-binding protein                        |
| 11772        | 10432 | -      | 1341        | Putative helicase                                          |
| 12452        | 11769 | -      | 684         | NTP-binding protein                                        |
| 12916        | 12449 | -      | 468         | hypothetical protein                                       |
| 13153        | 12917 | -      | 237         | hypothetical protein                                       |
| 13978        | 13214 | -      | 765         | hypothetical protein                                       |
| 14239        | 14102 | -      | 138         | hypothetical protein                                       |
| 14358        | 14236 | -      | 123         | hypothetical protein                                       |
| 14786        | 14355 | -      | 432         | hypothetical protein                                       |
| 14991        | 14800 | -      | 192         | hypothetical protein                                       |
| 15290        | 14988 | -      | 303         | FIG00629011: hypothetical protein                          |
| 15493        | 15302 | -      | 192         | hypothetical protein                                       |
| 15784        | 16095 | +      | 312         | Helix-turn-helix motif                                     |
| 16105        | 16515 | +      | 411         | hypothetical protein                                       |
| 16604        | 17194 | +      | 591         | hypothetical protein                                       |
| 17291        | 18436 | +      | 1146        | Phage integrase                                            |
| 18772        | 19062 | +      | 291         | hypothetical protein                                       |
| 20028        | 19108 | -      | 921         | N-acetylmuramoyl-L-alanine amidase (EC 3.5.1.28)           |
| 20398        | 20063 | -      | 336         | hypothetical protein                                       |
| 20710        | 20399 | -      | 312         | hypothetical protein                                       |
| 21074        | 20715 | -      | 360         | hypothetical protein                                       |
| 23120        | 21108 | -      | 2013        | BppU family phage baseplate upper protein                  |
| 23375        | 23133 | -      | 243         | hypothetical protein                                       |
| 26129        | 23388 | -      | 2742        | peptidoglycanDD-metalloendopeptidasefamilyprotein          |
| 26830        | 26126 | -      | 705         | hypothetical protein                                       |
| 29208        | 26836 | -      | 2373        | Phage tail length tape-measure protein T                   |
| 29865        | 29401 | -      | 465         | hypothetical protein                                       |
| 30506        | 29865 | -      | 642         | Phage tail protein                                         |
| 30868        | 30503 | -      | 366         | hypothetical protein                                       |
| 31193        | 30858 | -      | 336         | Phage protein                                              |
| 31503        | 31183 | -      | 321         | minor structural protein, putative                         |
| 31735        | 31490 | -      | 246         | Phage protein                                              |
| 33067        | 31898 | -      | 1170        | Phage major capsid protein                                 |
| 33738        | 33064 | -      | 675         | hypothetical protein                                       |
| 34900        | 33719 | -      | 1182        | Ammonium transporter                                       |
| 36606        | 34915 | -      | 1692        | Phage terminase, large subunit                             |
| 36970        | 36608 | -      | 363         | hypothetical protein                                       |
| 37025        | 36960 | -      | 66          | hypothetical protein                                       |

### Supplementary Table S1;

Table of gene list possessed by *phiEG37k* based on RAST analysis of whole genome sequence.

| Contig                              | Position | G0 | G2 | Gene                                                            | Types         |
|-------------------------------------|----------|----|----|-----------------------------------------------------------------|---------------|
| NODE_1_length_636754_cov_93.588013  | 139369   | C  | T  | bifunctional folylpolyglutamate synthase/dihydrofolate synthase | nonsynonymous |
| NODE_1_length_636754_cov_93.588013  | 143727   | T  | C  | (non-coding)                                                    | -             |
| NODE_1_length_636754_cov_93.588013  | 157050   | G  | A  | glycoside hydrolase family 125 protein                          | nonsynonymous |
| NODE_1_length_636754_cov_93.588013  | 251380   | C  | T  | hypothetical protein                                            | nonsynonymous |
| NODE_1_length_636754_cov_93.588013  | 255002   | G  | T  | MATE family efflux transporter                                  | nonsynonymous |
| NODE_1_length_636754_cov_93.588013  | 261677   | G  | A  | hypothetical protein                                            | nonsynonymous |
| NODE_1_length_636754_cov_93.588013  | 324729   | G  | A  | hypothetical protein                                            | nonsynonymous |
| NODE_1_length_636754_cov_93.588013  | 387729   | C  | T  | M42 family metalloproteinase                                    | nonsynonymous |
| NODE_1_length_636754_cov_93.588013  | 513149   | G  | A  | ABC transporter permease                                        | nonsynonymous |
| NODE_1_length_636754_cov_93.588013  | 569823   | C  | T  | citrate/2-methylcitrate synthase                                | nonsynonymous |
| NODE_2_length_604314_cov_72.335293  | 19395    | T  | C  | FtsW/RodA/SpoVE family cell cycle protein                       | nonsynonymous |
| NODE_2_length_604314_cov_72.335293  | 21696    | T  | A  | endonuclease MutS2                                              | nonsynonymous |
| NODE_2_length_604314_cov_72.335293  | 90416    | T  | G  | (non-coding)                                                    | -             |
| NODE_2_length_604314_cov_72.335293  | 130803   | T  | G  | purine/pyrimidine permease                                      | nonsynonymous |
| NODE_2_length_604314_cov_72.335293  | 258997   | G  | T  | (non-coding)                                                    | -             |
| NODE_2_length_604314_cov_72.335293  | 261633   | T  | A  | (non-coding)                                                    | -             |
| NODE_2_length_604314_cov_72.335293  | 263680   | T  | C  | (non-coding)                                                    | -             |
| NODE_2_length_604314_cov_72.335293  | 267202   | C  | A  | (non-coding)                                                    | -             |
| NODE_2_length_604314_cov_72.335293  | 285643   | G  | A  | primosomal protein DnaI                                         | synonymous    |
| NODE_2_length_604314_cov_72.335293  | 349817   | G  | A  | YvcK family protein                                             | synonymous    |
| NODE_2_length_604314_cov_72.335293  | 480519   | A  | G  | hypothetical protein                                            | synonymous    |
| NODE_2_length_604314_cov_72.335293  | 561385   | C  | T  | uracil-DNA glycosylase                                          | nonsynonymous |
| NODE_2_length_604314_cov_72.335293  | 592395   | C  | G  | phytoene/squalene synthase family protein                       | nonsynonymous |
| NODE_3_length_528442_cov_76.837329  | 5022     | A  | C  | cation transporter                                              | nonsynonymous |
| NODE_3_length_528442_cov_76.837329  | 33747    | A  | G  | (non-coding)                                                    | -             |
| NODE_3_length_528442_cov_76.837329  | 65695    | G  | T  | YitT family protein                                             | nonsynonymous |
| NODE_3_length_528442_cov_76.837329  | 118865   | C  | T  | PTS sugar transporter subunit IIC                               | nonsynonymous |
| NODE_3_length_528442_cov_76.837329  | 350715   | C  | T  | starvation-sensing protein RspA                                 | nonsynonymous |
| NODE_3_length_528442_cov_76.837329  | 353771   | A  | C  | (non-coding)                                                    | -             |
| NODE_3_length_528442_cov_76.837329  | 418413   | A  | G  | unknown                                                         | -             |
| NODE_3_length_528442_cov_76.837329  | 419401   | A  | G  | unknown                                                         | -             |
| NODE_4_length_346645_cov_92.251467  | 45194    | T  | C  | (non-coding)                                                    | -             |
| NODE_4_length_346645_cov_92.251467  | 51972    | C  | A  | (non-coding)                                                    | -             |
| NODE_4_length_346645_cov_92.251467  | 107254   | G  | A  | LPXTG cell wall anchor domain-containing protein                | nonsynonymous |
| NODE_4_length_346645_cov_92.251467  | 340503   | C  | A  | hypothetical protein                                            | nonsynonymous |
| NODE_5_length_233178_cov_105.519644 | 60309    | C  | T  | DNA-directed RNA polymerase subunit beta'                       | nonsynonymous |
| NODE_5_length_233178_cov_105.519644 | 207799   | T  | C  | transcription antiterminator                                    | synonymous    |
| NODE_6_length_227715_cov_102.686396 | 120986   | G  | A  | hypothetical protein                                            | synonymous    |
| NODE_6_length_227715_cov_102.686396 | 185067   | G  | T  | PadR family transcriptional regulator                           | nonsynonymous |
| NODE_7_length_208285_cov_77.626615  | 26118    | G  | A  | helix-turn-helix domain-containing protein                      | nonsynonymous |
| NODE_7_length_208285_cov_77.626615  | 31378    | T  | A  | ABC transporter ATP-binding protein                             | nonsynonymous |
| NODE_7_length_208285_cov_77.626615  | 59176    | A  | G  | (non-coding)                                                    | -             |
| NODE_7_length_208285_cov_77.626615  | 110729   | T  | C  | (non-coding)                                                    | -             |
| NODE_7_length_208285_cov_77.626615  | 117884   | C  | T  | alpha-galactosidase                                             | nonsynonymous |
| NODE_7_length_208285_cov_77.626615  | 180623   | T  | C  | MoxR family ATPase                                              | nonsynonymous |
| NODE_8_length_190413_cov_106.429422 | 38618    | G  | A  | (non-coding)                                                    | -             |
| NODE_8_length_190413_cov_106.429422 | 52044    | C  | T  | glutamate--tRNA ligase                                          | synonymous    |
| NODE_8_length_190413_cov_106.429422 | 73873    | G  | A  | PTS trehalose transporter subunit IIBC                          | nonsynonymous |
| NODE_8_length_190413_cov_106.429422 | 86423    | T  | G  | thiol reductant ABC exporter subunit CydD                       | nonsynonymous |
| NODE_8_length_190413_cov_106.429422 | 130883   | G  | T  | FliA/WhiG family RNA polymerase sigma factor                    | nonsynonymous |
| NODE_9_length_98316_cov_84.202369   | 16662    | C  | T  | asparagine synthase (glutamine-hydrolyzing)                     | nonsynonymous |
| NODE_9_length_98316_cov_84.202369   | 24012    | T  | G  | threonine/serine exporter family protein                        | synonymous    |
| NODE_10_length_93190_cov_97.429119  | 65403    | T  | C  | (non-coding)                                                    | -             |
| NODE_12_length_54283_cov_85.068931  | 8698     | T  | G  | helix-turn-helix domain-containing protein                      | nonsynonymous |
| NODE_12_length_54283_cov_85.068931  | 46446    | A  | G  | PRD domain-containing protein                                   | nonsynonymous |
| NODE_14_length_42167_cov_34.028662  | 53       | C  | G  | phosphopentomutase                                              | nonsynonymous |
| NODE_15_length_34545_cov_18.546651  | 26636    | A  | G  | unknown                                                         | -             |
| NODE_15_length_34545_cov_18.546651  | 30780    | T  | C  | unknown                                                         | -             |
| NODE_16_length_25828_cov_92.905366  | 12821    | T  | C  | unknown                                                         | -             |
| NODE_20_length_13824_cov_49.410778  | 9433     | C  | A  | unknown                                                         | -             |

**Supplementary Table S2;** List of SNPs on core-genome between *Enterococcus gallinarum* strains G0 and G2.

| Feature ID    | G0 - 1    | G0 - 2    | G0 - 3    | G2 - 4    | G2 - 5    | G2 - 6    | tagwise dispersions -<br>FDR p-value correction* |
|---------------|-----------|-----------|-----------|-----------|-----------|-----------|--------------------------------------------------|
| 0610005C13Rik | 208.33    | 225.50    | 241.00    | 320.50    | 308.50    | 377.33    | 3.6653E-03                                       |
| Apoa1         | 412.50    | 387.83    | 104.67    | 27.67     | 35.33     | 47.00     | 1.5264E-04                                       |
| Arntl         | 232.33    | 163.33    | 181.00    | 141.17    | 108.17    | 118.00    | 3.5388E-02                                       |
| Baia2l2       | 558.33    | 587.50    | 578.67    | 721.50    | 727.33    | 728.00    | 2.2159E-02                                       |
| Bmp2          | 674.83    | 646.50    | 636.17    | 791.67    | 828.50    | 891.50    | 2.9529E-02                                       |
| C3            | 2429.83   | 3857.00   | 2560.50   | 1455.50   | 2067.17   | 1433.67   | 3.6653E-03                                       |
| Cldn8         | 333.00    | 284.83    | 271.83    | 184.50    | 181.50    | 175.67    | 3.8762E-06                                       |
| Defa24        | 38.83     | 0.00      | 8.50      | 0.00      | 0.00      | 0.00      | 1.6368E-02                                       |
| Eln           | 257.67    | 230.00    | 240.33    | 180.83    | 158.33    | 136.83    | 1.6583E-03                                       |
| G6pc          | 7.50      | 17.33     | 7.17      | 1.67      | 0.50      | 0.00      | 1.0710E-02                                       |
| Gm21857       | 44.17     | 9.17      | 35.50     | 6.17      | 7.00      | 6.17      | 2.6955E-02                                       |
| Igfbp6        | 206.17    | 212.50    | 259.00    | 143.67    | 166.33    | 135.83    | 1.4491E-02                                       |
| Ighv1-66      | 1.00      | 13.67     | 66.50     | 1.00      | 0.00      | 1.17      | 1.6432E-02                                       |
| Ighv5-12      | 1.00      | 0.00      | 1.50      | 0.00      | 0.00      | 65.50     | 4.9774E-02                                       |
| Ighv5-17      | 5.17      | 2.67      | 1.50      | 168.83    | 7.17      | 4.00      | 2.0937E-02                                       |
| Igkv1-133     | 0.00      | 1.00      | 0.00      | 1.00      | 0.00      | 87.50     | 4.1259E-03                                       |
| Igkv12-46     | 171.00    | 1.67      | 26.33     | 2.17      | 1.67      | 7.50      | 2.4564E-02                                       |
| Igkv4-57-1    | 8.50      | 26.33     | 11.17     | 1.00      | 1.67      | 4.00      | 1.4491E-02                                       |
| Lrp2          | 24.17     | 15.67     | 18.50     | 8.50      | 6.17      | 4.00      | 2.4644E-02                                       |
| Lrrn4         | 31.17     | 47.00     | 49.00     | 21.33     | 23.33     | 10.17     | 3.9268E-02                                       |
| Msln          | 68.17     | 64.33     | 94.33     | 44.50     | 33.67     | 22.50     | 2.6428E-03                                       |
| Muc2          | 125961.83 | 105549.17 | 105549.17 | 125961.83 | 125961.83 | 125961.83 | 1.4491E-02                                       |
| Muc3          | 11911.33  | 9730.00   | 7668.17   | 14702.67  | 13385.50  | 15812.33  | 2.3076E-02                                       |
| Muc3a         | 527.83    | 471.17    | 423.33    | 797.83    | 626.50    | 811.33    | 6.3473E-04                                       |
| Muc4          | 1473.00   | 1382.17   | 1305.33   | 1876.33   | 1668.17   | 1788.67   | 2.9900E-02                                       |
| Myrf          | 40.00     | 41.00     | 47.83     | 15.50     | 21.17     | 16.83     | 1.6583E-03                                       |
| Npas2         | 302.17    | 227.83    | 196.00    | 168.83    | 143.50    | 116.00    | 2.2159E-02                                       |
| Per2          | 318.67    | 384.00    | 395.67    | 682.17    | 618.00    | 637.33    | 1.2217E-10                                       |
| Per3          | 175.83    | 224.50    | 196.00    | 336.00    | 334.67    | 374.50    | 1.4625E-07                                       |
| Scd2          | 4242.17   | 5520.50   | 4506.00   | 5957.17   | 6348.50   | 6871.17   | 4.1259E-03                                       |
| Serpine1      | 53.33     | 82.50     | 56.33     | 18.50     | 21.33     | 34.33     | 6.3473E-04                                       |
| Tef           | 1131.83   | 1549.83   | 1462.17   | 1973.50   | 2093.50   | 2020.00   | 4.8374E-04                                       |
| Tsku          | 484.17    | 500.33    | 466.33    | 578.67    | 705.83    | 688.17    | 1.5845E-02                                       |
| Upk3b         | 80.17     | 88.67     | 102.83    | 48.67     | 38.17     | 42.67     | 3.2874E-05                                       |

### Supplementary Table S3;

A List of normalized expression level of genes which were significantly changed in *phiEG37k* – colonized colon (G0) compared to uncolonized colons (G2). \* FDR p-values were calculated by EDGE.

| Antigen          | Clone        | Fluorescence         | Company       |
|------------------|--------------|----------------------|---------------|
| I-A <sup>b</sup> | AF6-120.1    | Alexa Fluor 488      | BioLegend     |
| CD11c            | N418         | Brilliant violet 421 | BioLegend     |
| CD103            | 2E7          | biotin-labeled       | BioLegend     |
| Streptavidin     | -            | PE-CF594             | BD Bioscience |
| CX3CR1           | SA011F11     | PE-Cy7               | BioLegend     |
| CD80             | 16-10A1      | PE                   | BioLegend     |
| CD3              | 17A2         | Pacific blue         | BioLegend     |
| CD4              | GK1.5        | PECy7                | BioLegend     |
| CD8              | 53-5.8       | PE                   | BioLegend     |
| IL-17A           | TC11-18H10.1 | PerCP/Cyanine5.5     | BioLegend     |
| IFN $\gamma$     | R4-6A2       | FITC                 | BioLegend     |
| Foxp3            | FJK-16s      | APC                  | eBioscience   |

**Supplementary Table S4; List of antibodies used for flow cytometric analysis**

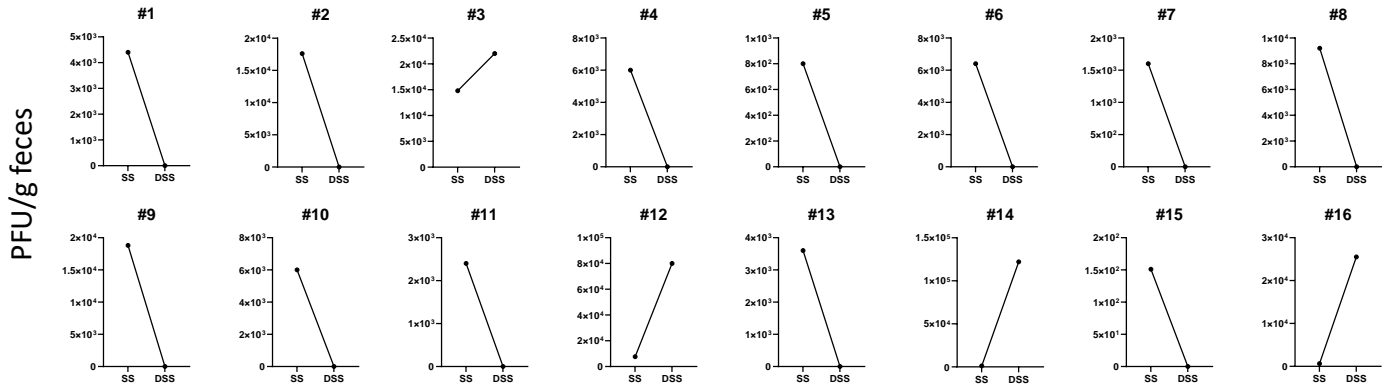

**Supplementary Figure S1; Alteration in the abundance of fecal VLPs by DSS colitis.**

The PFU of VLPs related with 16 *Enterococcal* bacterial clones, which showed sensitivity to infection by fecal VLP at the first screening plaque assay. The PFU of individual clones is displayed in separate graphs. All the line graphs were combined in one graph in Fig. 1b. *phiEG37k* was isolated by plaque assay with *Enterococcal* bacterial strain #16 (G0).

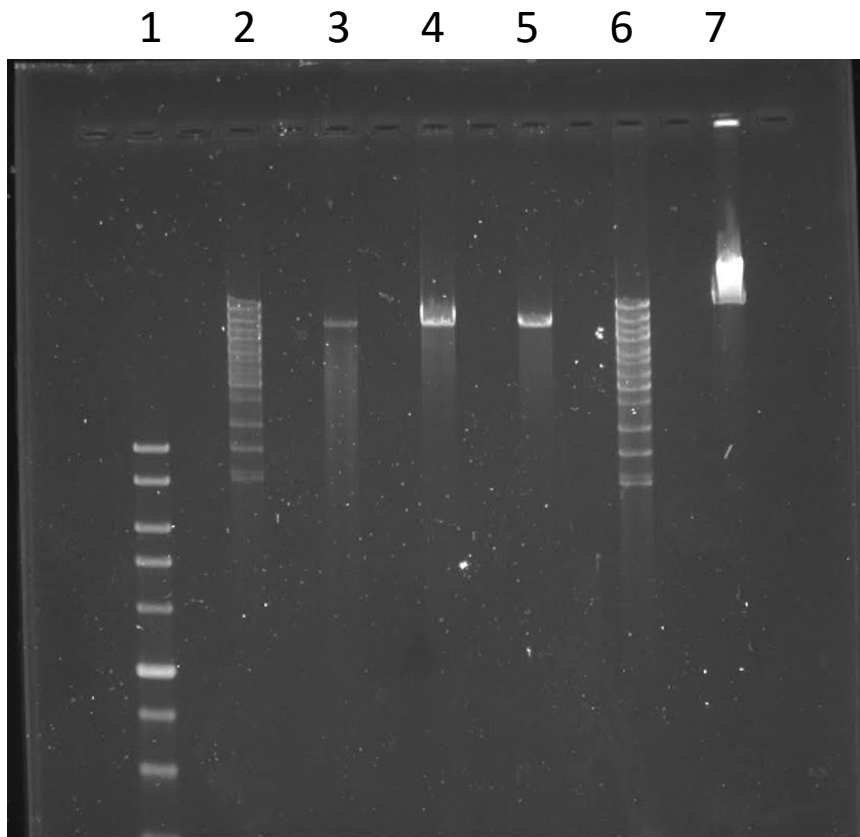

**Supplementary Figure S2** ; Full-length gel image of Figure 1e.

Lane 1;1kb ladder, Lane2 and Lane 6 ;High Molecular Weight DNA Marker (Invitrogen), Lane 3-5;*phiEG37k* and Lane 7; $\lambda$ DNA.

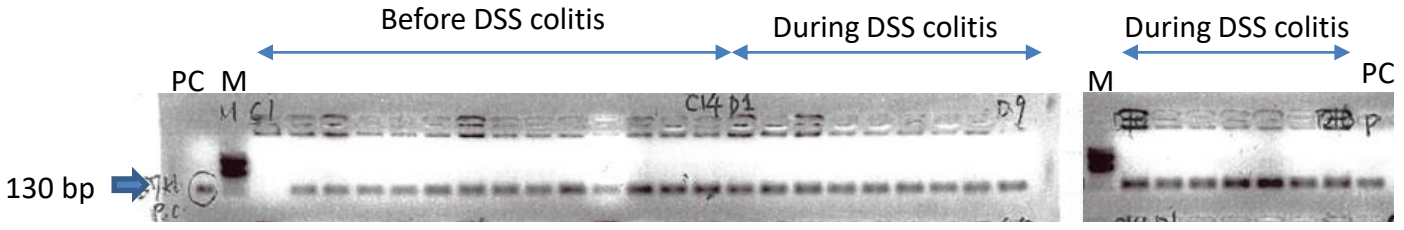

**Supplementary Figure S3** ; PCR analyses of of genomes of different clones of *E. gallinarum* by *phiEG37k*-specific primer. The genomes are extracted from feces of C57BL/6 mice before or during DSS-induced colitis. Bands of 130 base pair (bp) size of PCR products, which are the same size as that of PCR products generated from purified *phiEG37k* (PC), were detected in the lanes of the individual positive samples. The images of the agarose gels were cropped from the image of the same gel and show almost full-length gels. PC; PCR product which was generated by amplifying the genome of purified *phiEG37k* with *phiEG37k*-specific primer (positive control), M; Molecular weight marker, 100bp DNA ladder



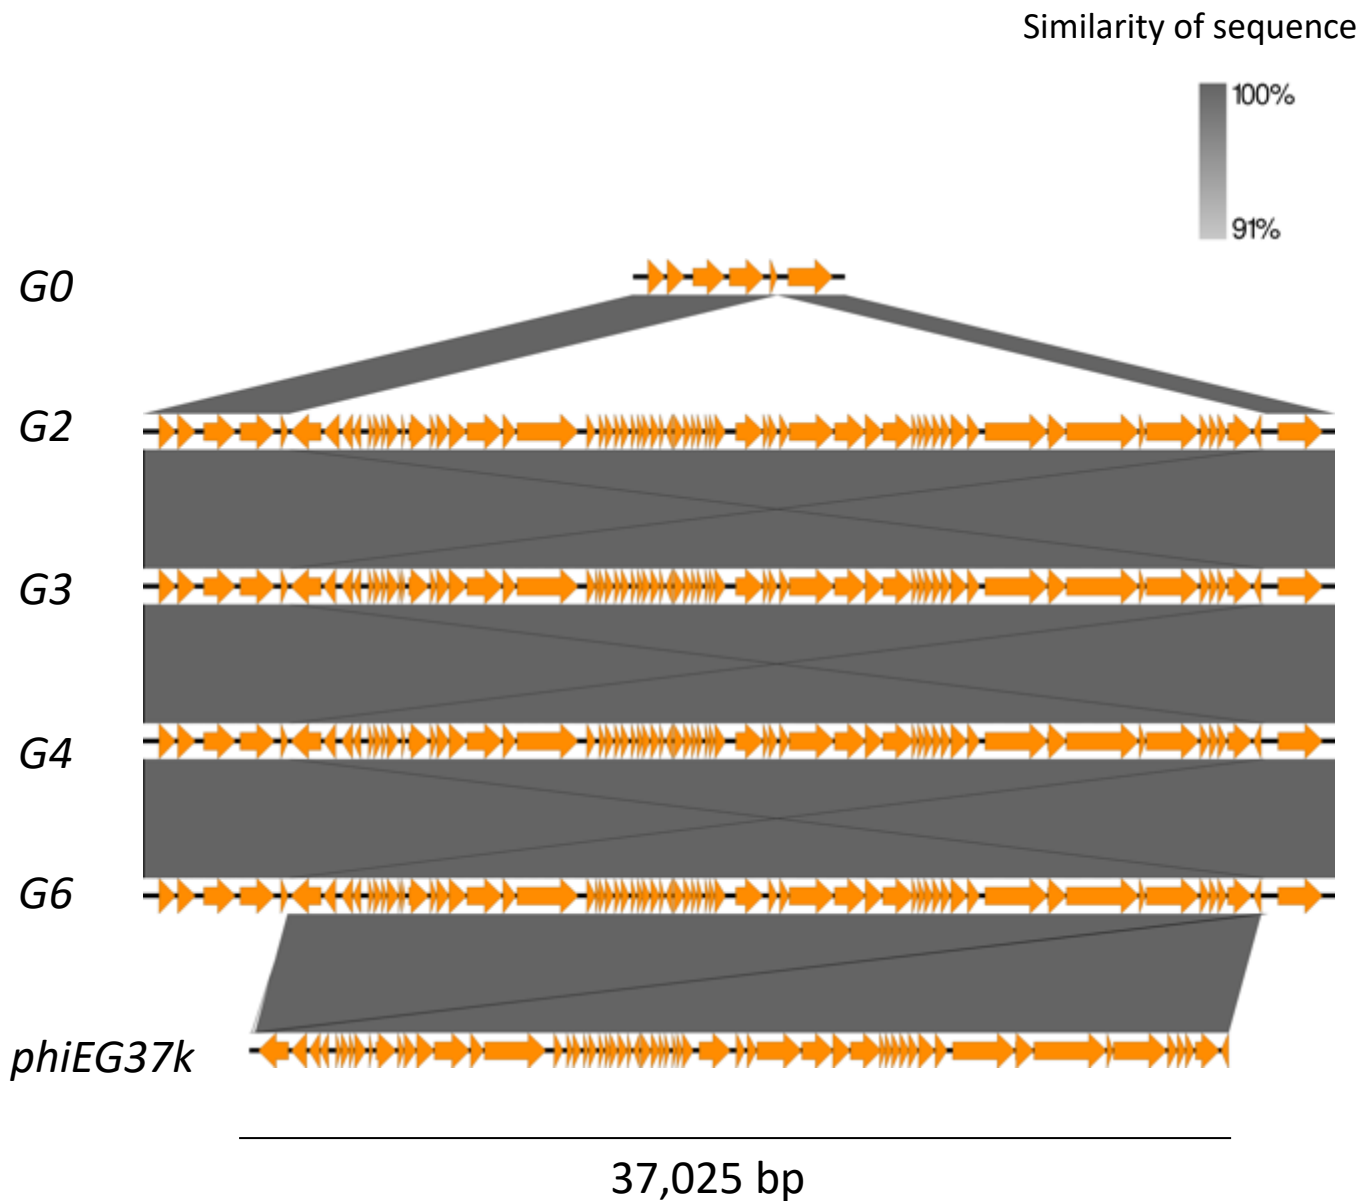

**Supplementary Figure S4; Analysis of *phiEG37k* integration sites of the four clones of gut *E. gallinarum* by draft whole-genome sequencing**

Displayed is only around the phage genome insertion site. Orange arrows indicate CDSs shown in Supplementary Table S1. The gray-color intensity indicates sequence similarity. All the *E. gallinarum* strains, G2, G3, G4 and G6, integrates *phiEG37k* genome at the same site with highly conserved sequence.

a

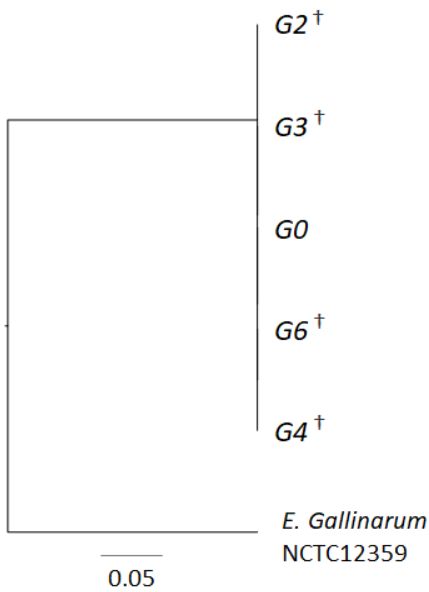

b

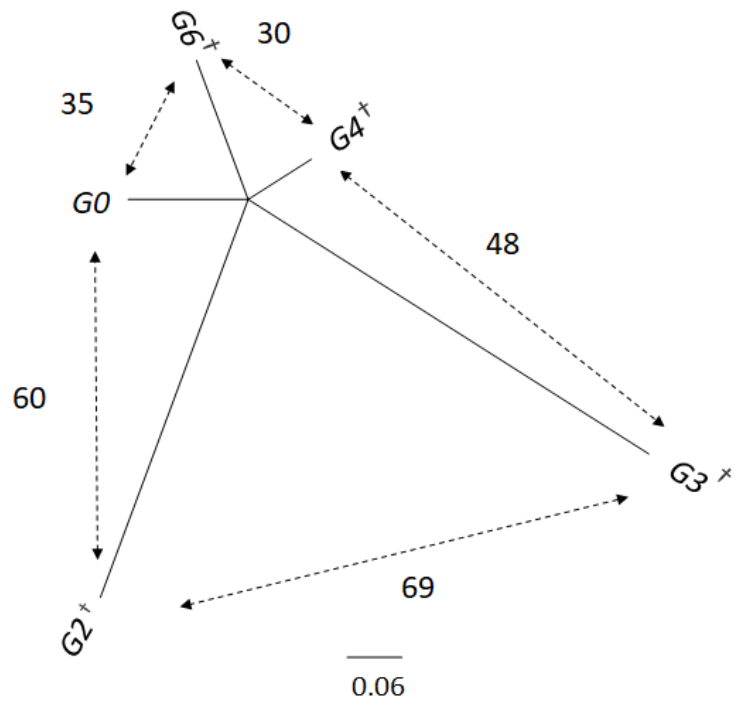

c

|    | G0 | G2 | G3 | G4 | G6 |
|----|----|----|----|----|----|
| G0 | 0  | 60 | 53 | 25 | 35 |
| G2 | 60 | 0  | 69 | 55 | 65 |
| G3 | 53 | 69 | 0  | 48 | 58 |
| G4 | 25 | 55 | 48 | 0  | 30 |
| G6 | 35 | 65 | 58 | 30 | 0  |

**Supplementary Figure S5 ; Phylogenetic tree based on core genome and Single Nucleotide Polymorphisms (SNPs) among *E. gallinarum*.**

(a) Phylogenetic tree created by analyzing the draft whole genome data of a type strain *E. gallinarum* NCTC12359 (accession no. GCA\_900447935.1) to *E. gallinarum* G0, G2, G3, G4, and G6.

(b) Phylogenetic tree and SNPs of *E. gallinarum* G0, G2, G3, G4, and G6 only. The presence or absence of *phiEG37k* does not affect the results of phylogenetic analysis because *phiEG37k* is not included in the core genome. The length of bars indicates an amount genetic change of each number. (c) Number of SNPs between individual *E. gallinarum* strains. †, lysogenic strain bearing *phiEG37k*

*phiEG37k*

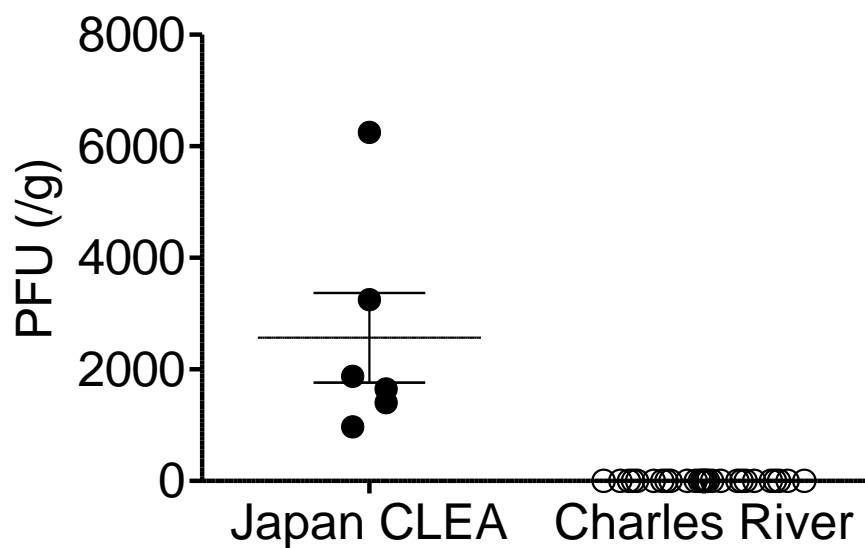

**Supplementary Figure S6;** Fecal titer of *phiEG37k* phage from C57BL/6 mice from two different vendors (Clea, n=6; Charles River Laboratories Japan, n=29). Fecal titer was measured within a week after the mice had shipped from the individual vendors to our facility.

## DSS

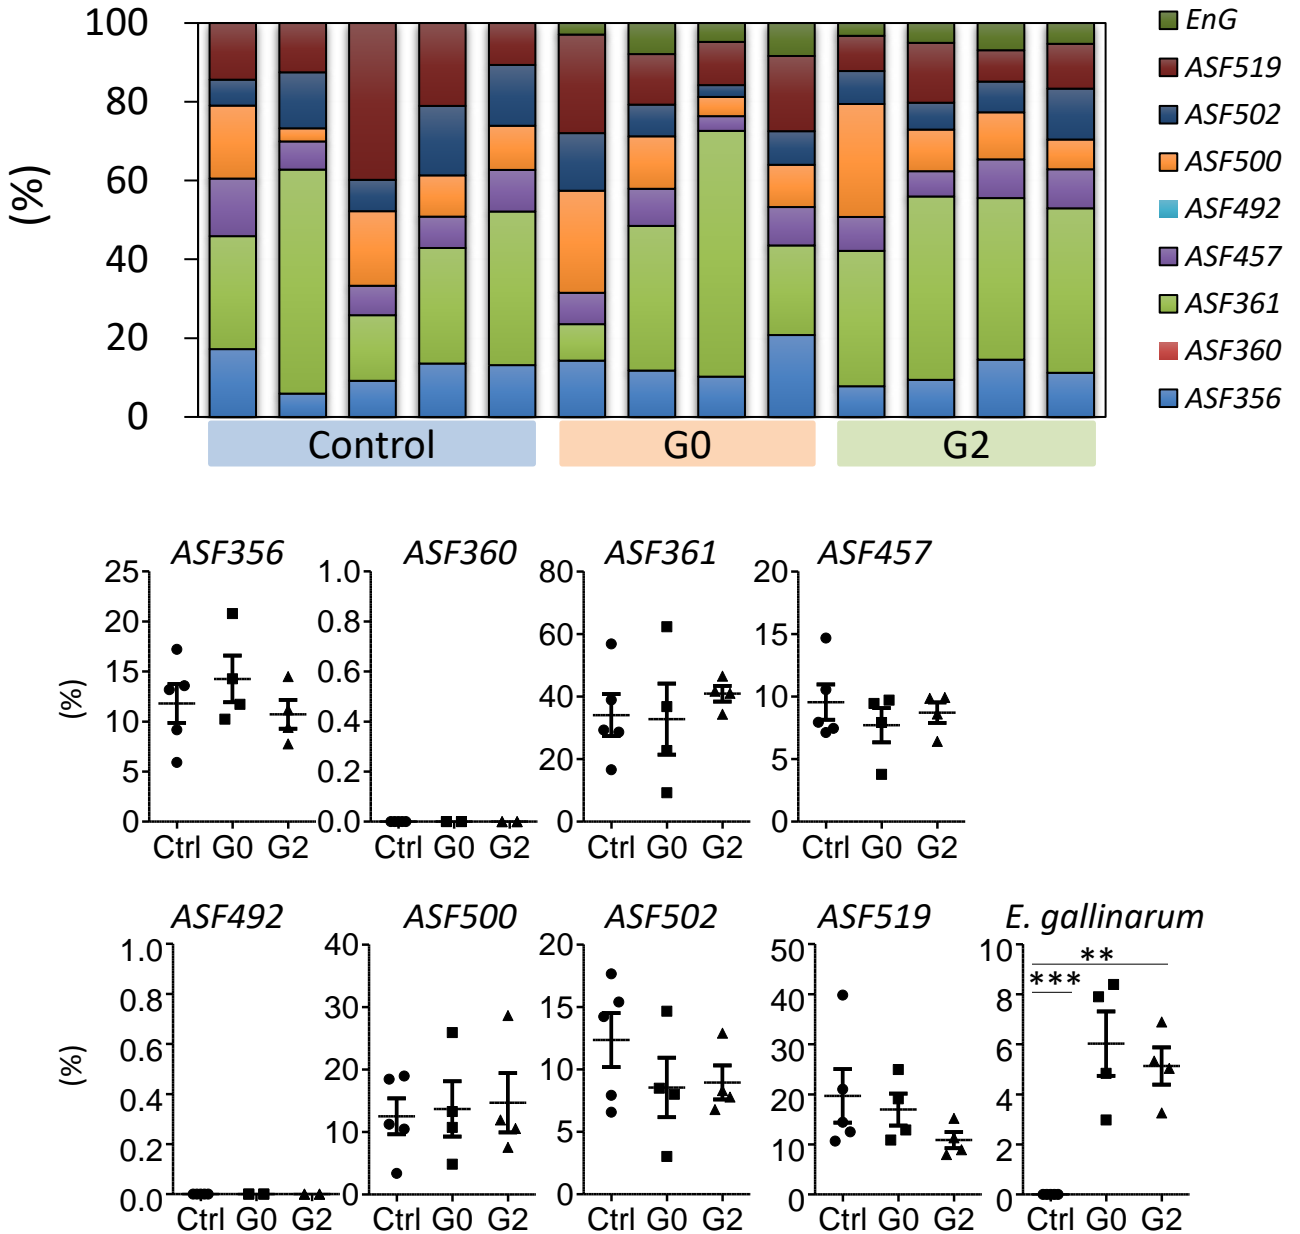

**Supplementary Figure S7; Components of colonic microbiota in ASF-mice without gavage or with gavage of G0 or G2 (G0 or G2, respectively).**

EnG; *E. gallinarum*, \*\*P < 0.01, \*\*\*P < 0.001

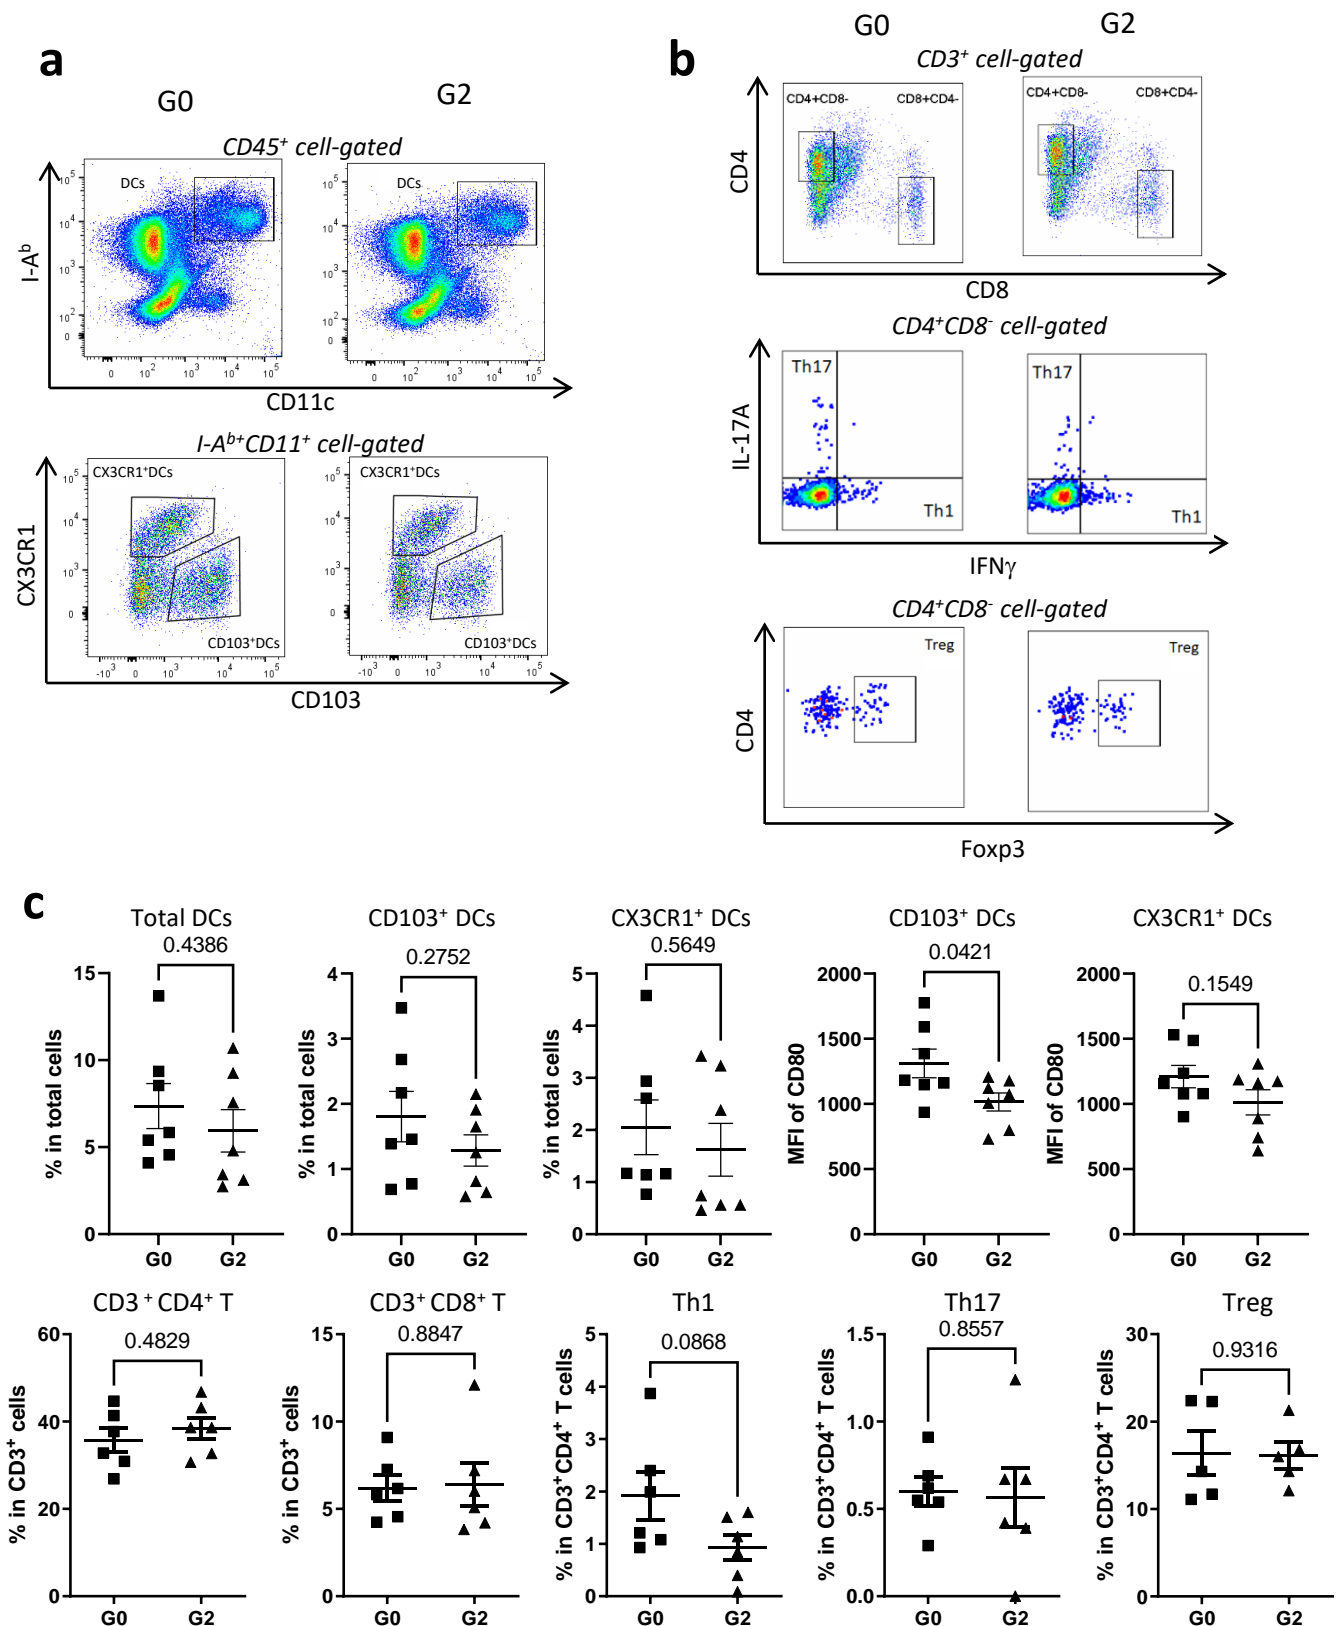

**Supplementary Figure S8; Flow-cytometric analysis of colonic lamina propria cells.**

Colonic lamina propria cells were isolated from G0- or G2-colonized ASF mice and subjected to flow-cytometric analysis for lymphocytes and dendritic cells (DCs). (a), (b) Representative cytograms of dendritic cells (a) and T lymphocytes (b). (c) Pooled data of the frequency of individual populations and mean fluorescence intensity (MFI) of CD80 of DCs. Student's t-test was performed. Error bars show standard errors.

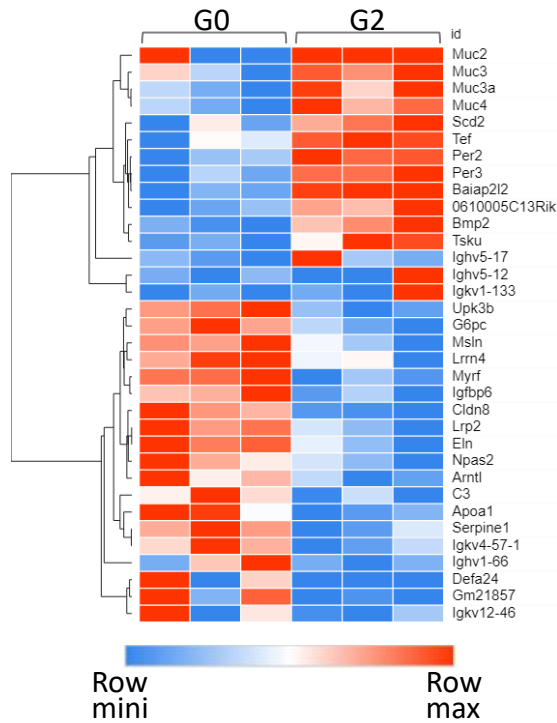

**Supplementary Figure S9; RNA-seq analysis of colonic tissue from G0- or G2-colonized ASF-mice in steady state.**

Differentially expressed genes with p-value less than 0.05 were listed up. A relative color scheme uses the minimum and maximum values in each row to convert values to colors. n=3 each.

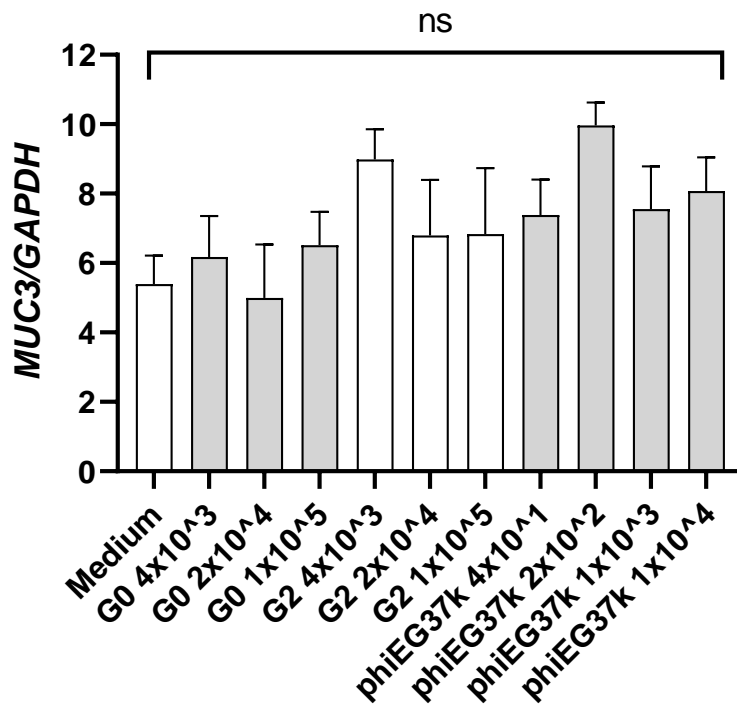

**Supplementary Figure S10; *MUC3* gene expression of Caco-2 cells co-cultured with *G0*, *G2* or *phiEG37k*.**

90 % confluent Caco2 cells were plated in 24-well plate and co-incubated with *G0*, *G2* or *phiEG37k* with indicating numbers of cells or viral particles for 4 hours. Total RNA was extracted and qRT-PCR of *MUC3* was performed. The error bars indicate standard error.

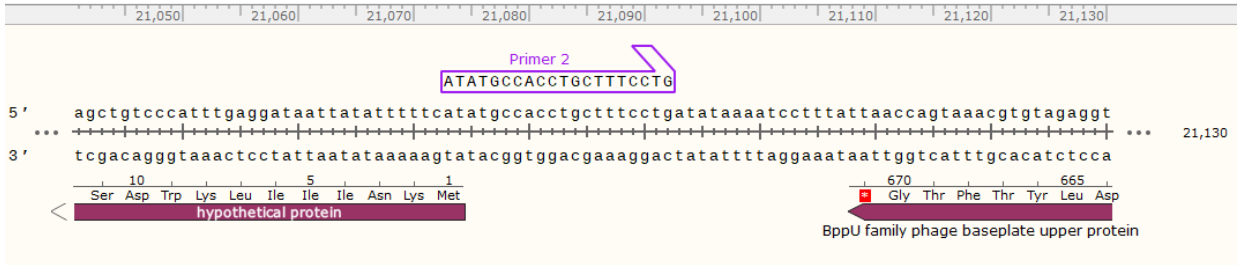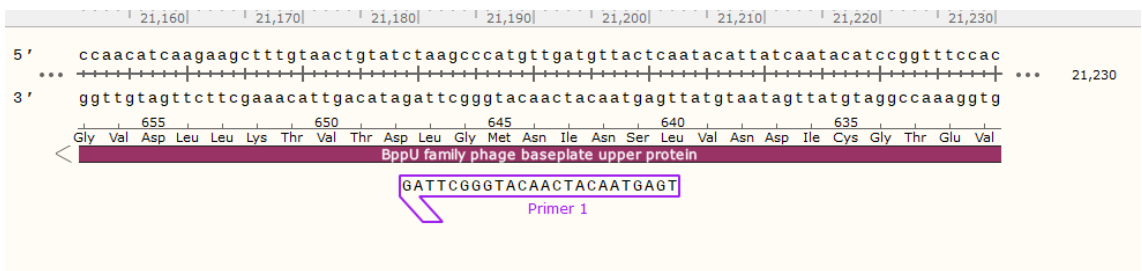

**Supplementary Figure S11; Positions of PCR primer for *phiEG37k*.**
